# Supplementary material for: Comparison of anticipated and actual control group outcomes in randomised trials in paediatric oncology provides evidence that historically controlled studies are biased in favour of the novel treatment
Source: PubMed Central journal article supplement (PMC4295234; doi:10.1186/1745-6215-15-481), 2014-12-10
Supplement: 13063_2014_2346_MOESM3_ESM.pdf [file 13063_2014_2346_MOESM3_ESM.pdf]

Disease areas (n = 16)

Identified Abstracts (n = 1083)

Excluded on abstract basis (n = 741)

Full Text Articles (n = 342)

Not relevant on full text basis (n = 210)

Paediatric cancer RCT with relevant outcome (n = 92),  
RQ [n = 107]; reason for exclusion:

- no sample size calculations presented [n=79]
- no control group rate given [n=21]
- other [7]

Included  
RCT publications (n=40) with RQs [n=48]
