# Supplementary material for: Comparison of anticipated and actual control group outcomes in randomised trials in paediatric oncology provides evidence that historically controlled studies are biased in favour of the novel treatment
Source: PubMed Central journal article supplement (PMC4295234; doi:10.1186/1745-6215-15-481), 2014-12-10

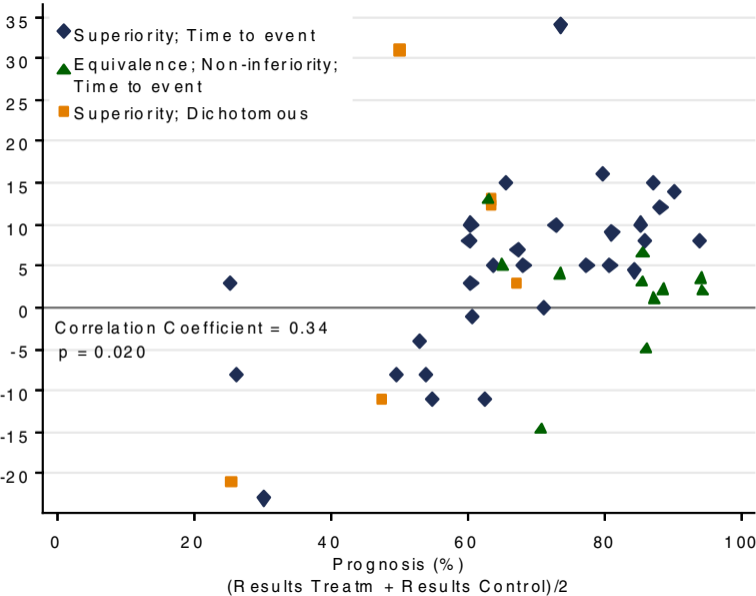

Supplement: 13063_2014_2346_MOESM5_ESM.pdf [file 13063_2014_2346_MOESM5_ESM.pdf]
